# Supplementary material for: Dietary Flavonoid Intake and Chronic Sensory Conditions: A Scoping Review
Source: Antioxidants (Basel). 2022 Jun 21;11(7):1214. doi: 10.3390/antiox11071214 (PMC9311508; doi:10.3390/antiox11071214)
Supplement: Supplementary file 1 [file antioxidants-11-01214-s001.zip › antioxidants-1737242-supplementary.pdf]

Supplementary Table S1. Quality assessment of case-control studies.

| Criteria[26]                                                                                                  | Ma et al.<br>(2015) [10] |
|---------------------------------------------------------------------------------------------------------------|--------------------------|
| Were the groups comparable other than the presence of disease in cases or the absence of disease in controls? | Yes                      |
| Were cases and controls matched appropriately?                                                                | No                       |
| Were the same criteria used for identification of cases and controls?                                         | No                       |
| Was exposure measured in a standard, valid and reliable way?                                                  | Yes                      |
| Was exposure measured in the same way for cases and controls?                                                 | Yes                      |
| Were confounding factors identified?                                                                          | Yes                      |
| Were strategies to deal with confounding factors stated?                                                      | Yes                      |
| Were outcomes assessed in a standard, valid and reliable way for cases and controls?                          | Yes                      |
| Was the exposure period of interest long enough to be meaningful?                                             | Unclear                  |
| Was appropriate statistical analysis used?                                                                    | Yes                      |

Supplementary Table S2. Quality assessment of cross-sectional studies.

| Criteria[26]                                                             | Mahoney & Loprinzi. 2014 [15] | Kim et al. 2018 [27] |
|--------------------------------------------------------------------------|-------------------------------|----------------------|
| Were the criteria for inclusion in the sample clearly defined?           | Yes                           | Yes                  |
| Were the study subjects and the setting described in detail?             | Yes                           | Yes                  |
| Was the exposure measured in a valid and reliable way?                   | Yes                           | No                   |
| Were objective, standard criteria used for measurement of the condition? | Yes                           | Yes                  |
| Were confounding factors identified?                                     | Yes                           | Yes                  |
| Were strategies to deal with confounding factors stated?                 | Yes                           | Yes                  |
| Were the outcomes measured in a valid and reliable way?                  | Yes                           | Yes                  |
| Was appropriate statistical analysis used?                               | Yes                           | Yes                  |

Supplementary Table S3. Quality assessment of cohort studies.

| Criteria[26]                                                                                               | Ramdas et al. 2012 [13] | Gopinath et al. 2018 [6] | Kang et al. 2018 [12] | Gopinath et al. 2020 [28] | Deteram et al. 2021 [30] | Tang et al. 2021 [29] |
|------------------------------------------------------------------------------------------------------------|-------------------------|--------------------------|-----------------------|---------------------------|--------------------------|-----------------------|
| Were the two groups similar and recruited from the same population?                                        | Yes                     | Yes                      | Yes                   | Yes                       | Yes                      | Yes                   |
| Were the exposures measured similarly to assign people to both exposed and unexposed groups?               | Yes                     | Yes                      | Yes                   | Yes                       | Yes                      | Yes                   |
| Was the exposure measured in a valid and reliable way?                                                     | Yes                     | Yes                      | Yes                   | Yes                       | Yes                      | Yes                   |
| Were confounding factors identified?                                                                       | Yes                     | Yes                      | Yes                   | Yes                       | Yes                      | Yes                   |
| Were strategies to deal with confounding factors stated?                                                   | Yes                     | Yes                      | Yes                   | Yes                       | Yes                      | Yes                   |
| Were the groups/participants free of the outcome at the start of the study (or at the moment of exposure)? | Yes                     | Yes                      | Yes                   | Yes                       | No                       | Yes                   |
| Were the outcomes measured in a valid and reliable way?                                                    | Yes                     | Yes                      | Yes                   | Yes                       | Yes                      | Yes                   |
| Was the follow up time reported and sufficient to be long enough for outcomes to occur?                    | Yes                     | Yes                      | Yes                   | Yes                       | Yes                      | Yes                   |
| Was follow up complete, and if not, were the reasons to loss to follow up described and explored?          | No, yes                 | Unclear, unclear         | Unclear, unclear      | Unclear, no               | No, no                   | Unclear, no           |
| Were strategies to address incomplete follow up utilized?                                                  | Unclear                 | Unclear                  | Unclear               | Unclear                   | Unclear                  | Unclear               |
| Was appropriate statistical analysis used?                                                                 | Yes                     | Yes                      | Yes                   | Yes                       | Yes                      | Yes                   |

Supplementary Table S4. Quality assessment of randomised controlled trials.

| Criteria[26]                                                                                                                                                                          | Terai et al.<br>(2014) [11] |
|---------------------------------------------------------------------------------------------------------------------------------------------------------------------------------------|-----------------------------|
| Was true randomization used for assignment of participants to treatment groups?                                                                                                       | Yes                         |
| Was allocation to treatment groups concealed?                                                                                                                                         | Yes                         |
| Were treatment groups similar at the baseline?                                                                                                                                        | Yes                         |
| Were participants blind to treatment assignment?                                                                                                                                      | No                          |
| Were those delivering treatment blind to treatment assignment?                                                                                                                        | Yes                         |
| Were outcomes assessors blind to treatment assignment?                                                                                                                                | Yes                         |
| Were treatment groups treated identically other than the intervention of interest?                                                                                                    | Yes                         |
| Was follow up complete and if not, were differences between groups in terms of their follow up adequately described and analyzed?                                                     | Yes                         |
| Were participants analyzed in the groups to which they were randomized?                                                                                                               | Yes                         |
| Were outcomes measured in the same way for treatment groups?                                                                                                                          | Yes                         |
| Were outcomes measured in a reliable way?                                                                                                                                             | Yes                         |
| Was appropriate statistical analysis used?                                                                                                                                            | Yes                         |
| Was the trial design appropriate, and any deviations from the standard RCT design (individual randomization, parallel groups) accounted for in the conduct and analysis of the trial? | Yes                         |

Supplementary Figure S1. Screen capture of the search strategy utilised in OVID. This search was re-run on 14/06/2022 as a copy of the original search was not screen captured. Note that there was no year limit in the original search, but to reflect the original search done in 2021, we have restricted abstracts up to 2021.

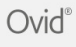

[My Account](#)
[Ask a University of Sydney Librarian](#)
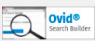
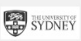
[Help](#)
[Feedback](#)
[Logout](#)

[Search](#)
[Journals](#)
[Books](#)
[Multimedia](#)
[My Workspace](#)
[EBP Tools](#)
[What's New](#)

▼ Search History (4)

View Saved

| <input type="checkbox"/> | # ▲ | Searches                                                                                                                                                                                                                                                                                                     | Results | Type     | Actions                                                | Annotations |
|--------------------------|-----|--------------------------------------------------------------------------------------------------------------------------------------------------------------------------------------------------------------------------------------------------------------------------------------------------------------|---------|----------|--------------------------------------------------------|-------------|
| <input type="checkbox"/> | 1   | » ((Hearing loss or hard of hearing or deaf* or hearing problems or hearing health or loss of hearing or hearing impaired or Hearing Disorder or Tinnitus or (Cataracts or glaucoma or macular degeneration or diabetic retinopathy) or (Dual sensory loss or dual sensory impairment)) and flavonoids). af. | 518     | Advanced | <a href="#">Display Results</a> <a href="#">More ▼</a> |             |
| <input type="checkbox"/> | 2   | » limit 1 to abstracts                                                                                                                                                                                                                                                                                       | 479     | Advanced | <a href="#">Display Results</a> <a href="#">More ▼</a> |             |
| <input type="checkbox"/> | 3   | » limit 2 to english language                                                                                                                                                                                                                                                                                | 448     | Advanced | <a href="#">Display Results</a> <a href="#">More ▼</a> |             |
| <input type="checkbox"/> | 4   | » limit 3 to yr="1860 - 2021"                                                                                                                                                                                                                                                                                | 428     | Advanced | <a href="#">Display Results</a> <a href="#">More ▼</a> |             |
